# Supplementary material for: Microalgal biomass production pathways: evaluation of life cycle environmental impacts
Source: Springer Nature journal article supplement (doi:10.1186/1754-6834-6-88), 2013-01-01

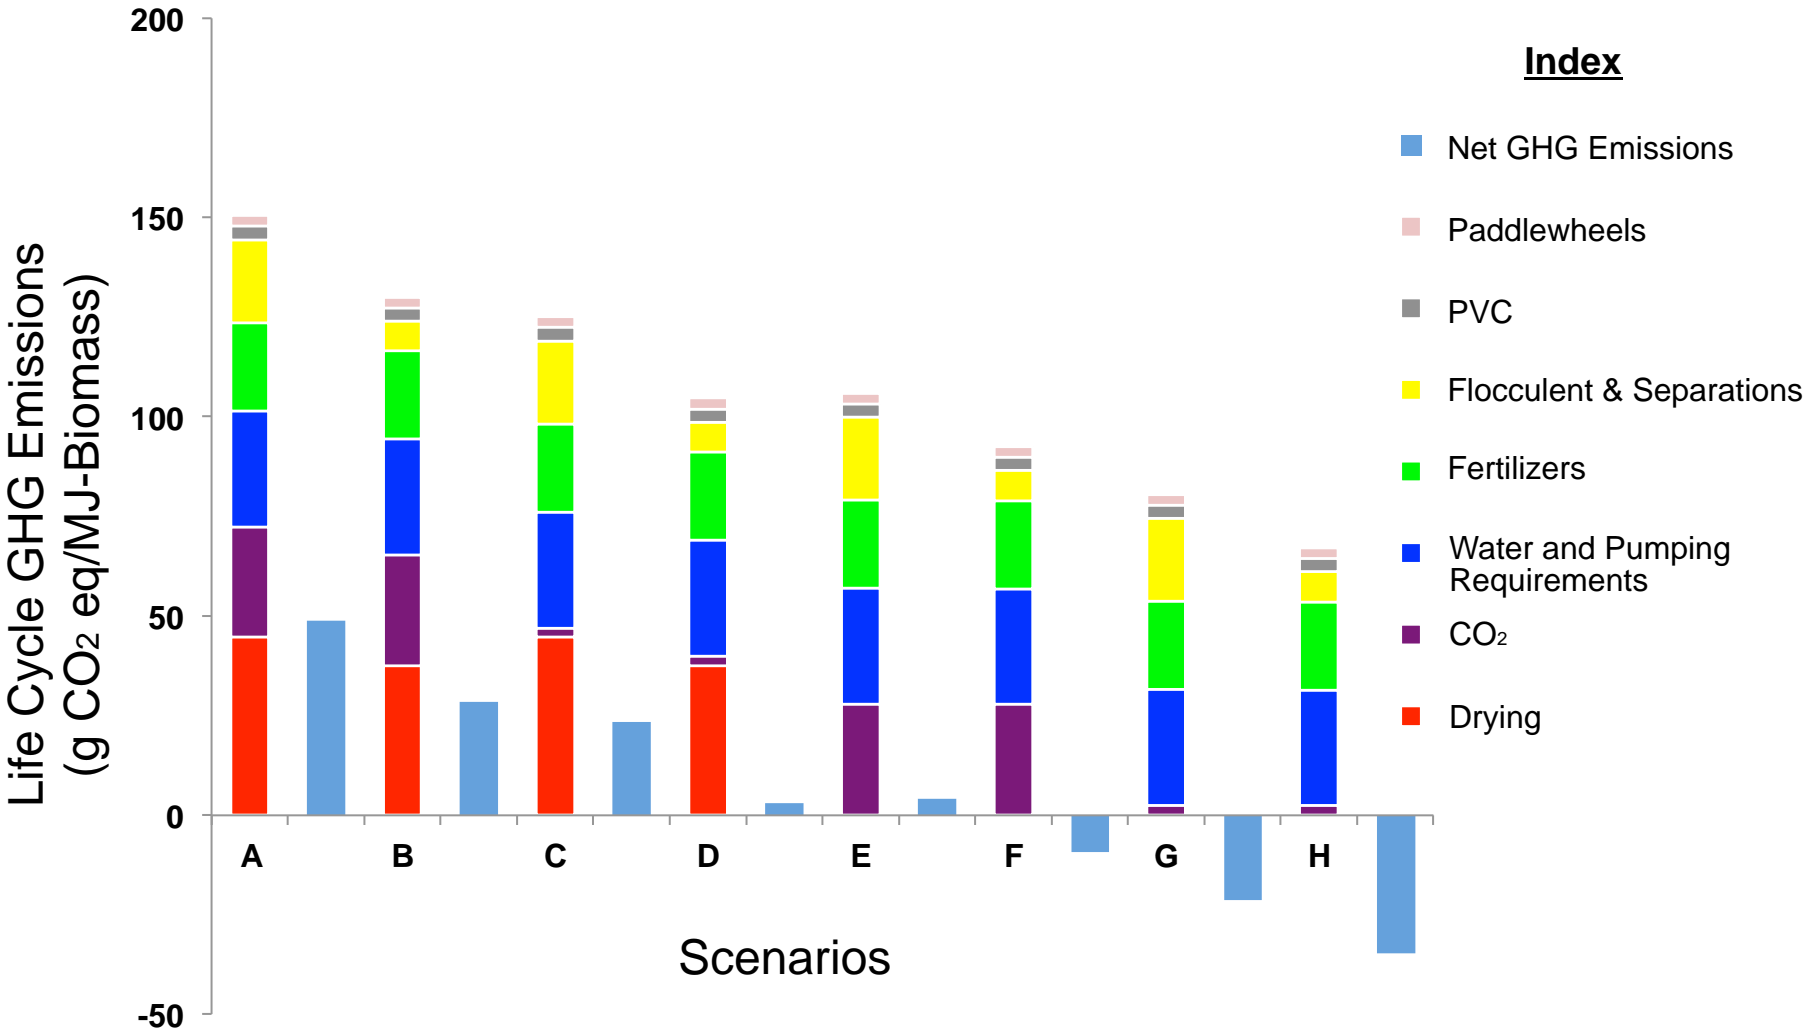

Supplement: 13068_2013_313_MOESM4_ESM.pdf [file 13068_2013_313_MOESM4_ESM.pdf]
